# Supplementary material
Source: publisher figshare collection journal article supplement (https://frontiersin.figshare.com/ndownloader/files/15551756)
Supplement: Supplementary file 1 [file 15551756]

## Sheet: Data
N	Plant type	Extraction method	d2H [‰]	d18O [‰]	D-exe [‰]	Sample tot. weight [g]	Extract eff. [-]
1	Grass indoor	M0	4.35172	11.7566	-89.7008	2.18	0.995074
2	Grass indoor	M0	5.94062	13.2798	-100.298	2.74	0.984127
3	Grass indoor	M0	-11.3308	9.89523	-90.4926	2.39	0.693694
1	Grass indoor	M1	3.45873	11.02	-84.701	7.52	0.732687
2	Grass indoor	M1	-5.3055	8.65895	-74.5771	7.37	0.733618
3	Grass indoor	M1	3.05886	10.3001	-79.342	6.84	0.763975
1	Grass indoor	M2	-0.677986	11.6148	-93.5965	2.18	0.920635
2	Grass indoor	M2	9.70793	13.1886	-95.8012	2.38	0.927184
3	Grass indoor	M2	21.4312	12.4617	-78.2622	2.56	0.934211
1	Grass indoor	M3	7.27871	12.2231	-90.5063	2.45	0.733945
2	Grass indoor	M3	13.625	12.1942	-83.9285	3.08	0.849711
3	Grass indoor	M3	-3.26603	8.9319	-74.7212	3.82	0.899194
1	Grass indoor	M4	2.76875	12.3667	-96.1648	2.57	1
2	Grass indoor	M4	-31.9233	6.73447	-85.799	3.21	0.564189
3	Grass indoor	M4	5.00612	13.6139	-103.905	2.36	0.944954
1	Grass indoor	REFT				3.12	0.319444
2	Grass indoor	REFT	-3.06116	13.1222	-108.039	3.27	0.819398
3	Grass indoor	REFT	-22.5831	7.56096	-83.0708	3.44	0.783465
1	Grass indoor	REFS	4.0179	11.3531	-86.8073	3.11	0.912587
2	Grass indoor	REFS	-16.4358	9.84682	-95.2104	2.28	0.701422
3	Grass indoor	REFS	-26.325	7.07765	-82.9462	2.48	0.691304
1	Melon indoor	M0	-23.2616	5.91671	-70.5953	3.02	0.716263
2	Melon indoor	M0	-22.264	5.62938	-67.299	2.43	0.625532
3	Melon indoor	M0	-25.6715	3.13387	-50.7425	3.07	0.871186
1	Melon indoor	M1	1.03944	9.78612	-77.2495	2.62	0
2	Melon indoor	M1	15.6254	6.51672	-36.5084	1.65	0
3	Melon indoor	M1	14.1687	6.386	-36.9193	1.7	0
1	Melon indoor	M2	11.4562	8.21022	-54.2255	2.65	0.876
2	Melon indoor	M2	-5.08295	6.67223	-58.4608	2.53	0.838298
3	Melon indoor	M2	-8.72956	6.06956	-57.286	2.29	0
1	Melon indoor	M3	7.31429	9.55313	-69.1107	2.33	0
2	Melon indoor	M3	1.90192	10.6449	-83.2575	2.75	0
3	Melon indoor	M3	1.38789	10.4573	-82.2707	2.53	0
1	Melon indoor	M4	-12.2004	5.9471	-59.7772	2.21	0.709184
2	Melon indoor	M4	11.7733	7.86976	-51.1847	2.21	0.660287
3	Melon indoor	M4	-15.8023	6.42876	-67.2324	2.52	0.718062
1	Melon indoor	REFT	-10.8124	7.97766	-74.6337	1.87	0.911111
2	Melon indoor	REFT	-13.5336	7.29056	-71.858	2.37	0.862222
3	Melon indoor	REFT	-11.4354	7.65322	-72.6611	1.97	0.791444
1	Melon indoor	REFS	-4.34169	7.52511	-64.5426	2.57	0.983806
2	Melon indoor	REFS	-2.16503	8.4566	-69.8178	2.98	0.982578
3	Melon indoor	REFS	-12.8007	6.75139	-66.8118	2.65	0.886275
1	Grass lawn	M0	-62.7565	-8.78893	7.55491	2	0.76506
2	Grass lawn	M0	-61.8195	-9.00092	10.1879	1.1	0.60274
3	Grass lawn	M0	-58.0747	-8.56165	10.4185	2.2	0.88587
1	Grass lawn	M1				2.6
2	Grass lawn	M1				3
3	Grass lawn	M1				1.9
1	Grass lawn	M2	-43.2574	-6.34093	7.47003	2.1	0.571429
2	Grass lawn	M2	-38.9228	-6.02922	9.31097	2.2	0.682171
3	Grass lawn	M2	-47.8607	-7.87	15.0993	2.3	0.699346
1	Grass lawn	M3				2.1
2	Grass lawn	M3				2.2
3	Grass lawn	M3				2.3
1	Grass lawn	M4	-83.7158	-13.6234	25.2715	1.1	0.657895
2	Grass lawn	M4				1.21	0.6
3	Grass lawn	M4	-55.4025	-7.88728	7.6958	2.2	0.787356
1	Grass lawn	REFT	-90.5389	-12.7842	11.7346
2	Grass lawn	REFT	-80.4727	-11.2526	9.54792
3	Grass lawn	REFT
1	Grass lawn	REFS	-85.34	-12.3227	13.2417	2.13	0.613636
2	Grass lawn	REFS	-62.4246	-9.10191	10.3907	2.1	0.605882
3	Grass lawn	REFS				2.2	0.771084
1	Grass pasture	M0	-52.9218	-7.68075	8.52423	3.1	0.914729
2	Grass pasture	M0	-56.6764	-7.89675	6.49758	3.2	0.886121
3	Grass pasture	M0	-56.5014	-8.27324	9.68446	3.3	0.865052
1	Grass pasture	M1				6.5
2	Grass pasture	M1				5.4
3	Grass pasture	M1				7
1	Grass pasture	M2	-53.0172	-9.16997	20.3425	6.66	0.321127
2	Grass pasture	M2	-51.6751	-8.95852	19.9931	5.82	0.721992
3	Grass pasture	M2	-70.7267	-10.6979	14.8569	6.32	0.5
1	Grass pasture	M3				3.1	0.869888
2	Grass pasture	M3	-52.7482	-11.7197	41.0092	3.2	0.861702
3	Grass pasture	M3	-53.0006	-10.431	30.4474	3.3	0.869416
1	Grass pasture	M4	-74.752	-11.8003	19.6503	3.1	0
2	Grass pasture	M4	-63.6261	-9.40489	11.613	3.2	0
3	Grass pasture	M4	-58.7326	-9.0546	13.7042	3.3	0
1	Grass pasture	REFT	-47.4164	-6.31072	3.06939	6.66	0.990307
2	Grass pasture	REFT	-94.097	-14.0774	18.5224	5.82	0.865942
3	Grass pasture	REFT	-78.9545	-11.4342	12.5189	6.32	0.883362
1	Grass pasture	REFS				6.66	0.629825
2	Grass pasture	REFS	-99.8184	-14.7776	18.4027	5.82	0.593385
3	Grass pasture	REFS	-52.7935	-7.59195	7.94215	6.32	0.918626
	Irrigation	20181001	-62.1563	-8.08472	2.52143
	Irrigation	20181001	-62.5893	-8.72724	7.22861
	Irrigation	20181005	-61.8696	-7.73655	0.0227787
	Irrigation	20181010	-61.7929	-7.99119	2.13655
	Irrigation	20181015	-62.9343	-8.02958	1.30234
	Irrigation	20181018
	Irrigation	20181023	-62.0778	-7.78755	0.222653
	Irrigation	20181025	-61.9061	-7.96225	1.79198
	Irrigation	20181029	-61.1316	-7.75736	0.927287
	Irrigation	20181102	-61.5271	-7.83743	1.17227
